# Supplementary material for: Perillartine protects against metabolic associated fatty liver in high-fat diet-induced obese mice
Source: Royal Society of Chemistry journal article supplement (doi:10.1039/d2fo02227c), 2022-12-21
Supplement: d2fo02227c1.pdf [file d2fo02227c1.pdf]

Table S1. RT-PCR primer sequence

| Gene Name | Sequence | 5'-3'                     |
|-----------|----------|---------------------------|
| β-actin   | Forward  | CGACAGGATGCAGAAGGAGAT     |
|           | Reverse  | CAAGAAAGGGTGTAAACGCAACTA  |
| ACC1      | Forward  | GGATGGTGTTCACCTCGGTAATAGA |
|           | Reverse  | GGGTGATATGTGCTGCGTCAT     |
| MTTP      | Forward  | ATCATTCTCAGGAACTTCAG      |
|           | Reverse  | GTGATGTCAGTGGTTATTAC      |
| APOB      | Forward  | CTCCTACAAGAATAAGTATGG     |
|           | Reverse  | CATCTTCTTAGTACCTTCAC      |
| FASN      | Forward  | GCAAGCTGAAGGACCTGTCT      |
|           | Reverse  | TCCTCGGAGTGAATCTGGGT      |
| MGAT1     | Forward  | CACTTTGGTGGATCTGATTTGG    |
|           | Reverse  | CTGGACTATGGGATTAGGAGGC    |
| SCD1      | Forward  | GCTCATCGCTTGTGGAGCCAC     |
|           | Reverse  | GGACCCCAGGGAAACCAGGAT     |
| ACO       | Forward  | TCACAGCAGTGGGATTCCAA      |
|           | Reverse  | TCTGCAGCATCATAACAGTGTTCTC |
| PPARα     | Forward  | ATGGTGGACACGGAAAGCC       |
|           | Reverse  | CGATGGATTGCGAAATCTCTTGG   |
| BCL2      | Forward  | TTCTACTACAGGACCGACTG      |
|           | Reverse  | CTCTAAGGTAACACGATACG      |
| CPT1α     | Forward  | GGTGAACAGCAACTATTATG      |
|           | Reverse  | AGACGAATTGGTTTGATTTC      |
| CYP2C8    | Forward  | TCCTGTGTTACCGTGTATT       |
|           | Reverse  | TCAATCAGGGCTTCCTTCAC      |
| G6PC      | Forward  | TCCATACTGGTGGGTTTTGG      |
|           | Reverse  | GAGGAAAATGAGCAGCAAGG      |
| NPAS2     | Forward  | AGTCTGAGAAGAAGCGTCGG      |
|           | Reverse  | TGTCACAGATTTCCGTTTGC      |
| G6Pase    | Forward  | CATTGACACCACCCCTTTGC      |
|           | Reverse  | CCCTGTACATGCTGGAGTTGAG    |
| PEPCK     | Forward  | CCCTGCGAGTGCTTAGTGGA      |
|           | Reverse  | GGCCAGCCAGCAGTTATTGTA     |
| FBP1      | Forward  | CCTTAACGAGGGCTACGCCA      |
|           | Reverse  | ACAGCAGTCTCAGCTTTCCATTG   |
| PKLR      | Forward  | ATGAAACTTCGGCTCACTCCT     |
|           | Reverse  | TGTATGGGATGGCGGATAGTA     |
