# Supplementary material for: Perillartine protects against metabolic associated fatty liver in high-fat diet-induced obese mice
Source: Royal Society of Chemistry journal article supplement (doi:10.1039/d2fo02227c), 2022-12-21
Supplement: d2fo02227c2.pdf [file d2fo02227c2.pdf]

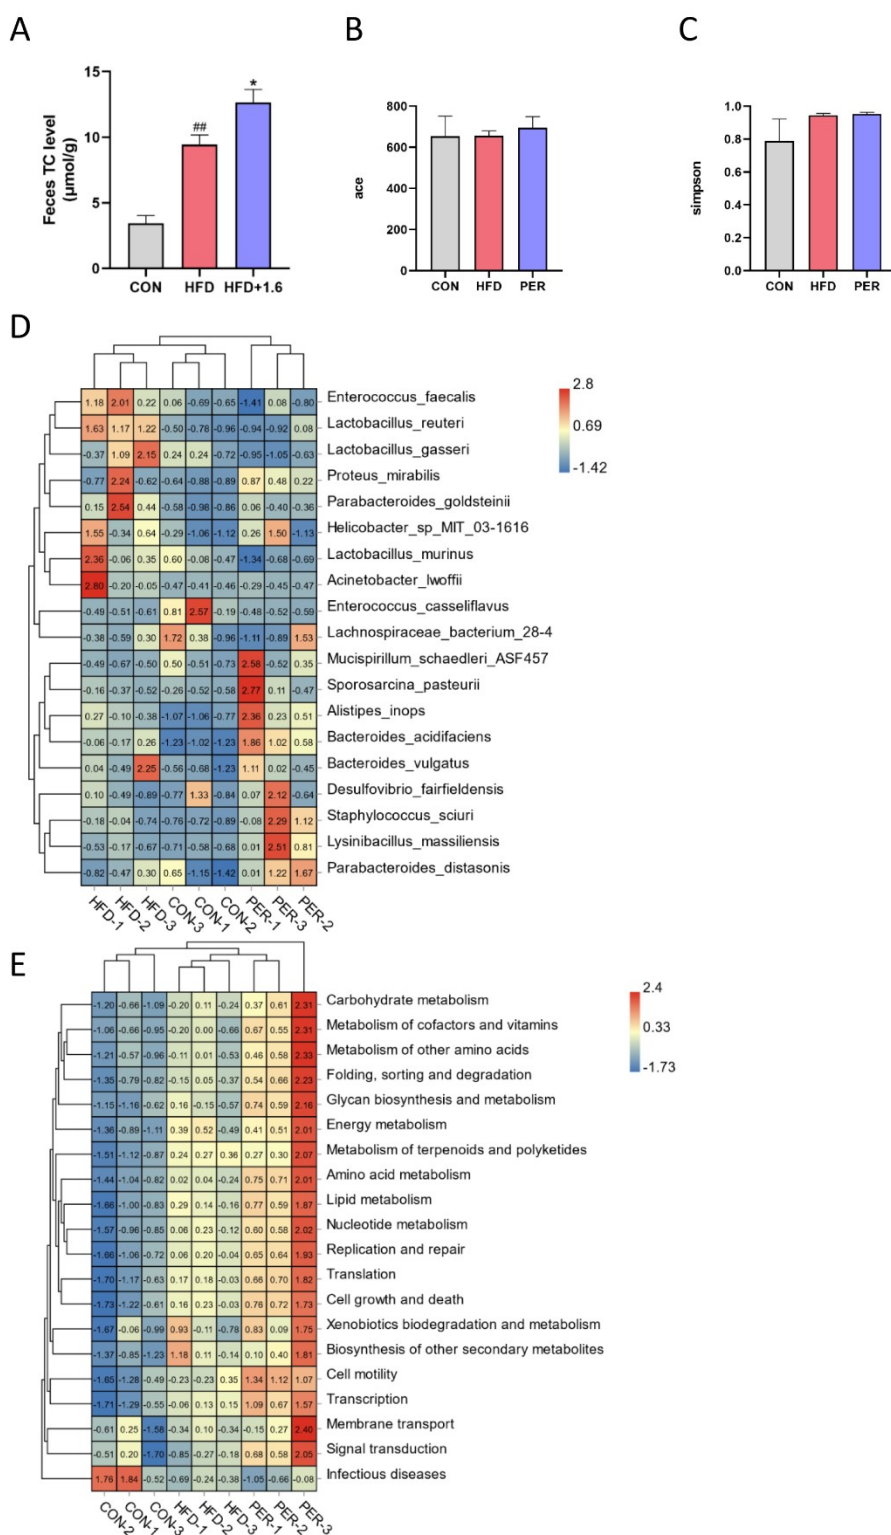

Supplemental figure 1. Effects of Perillartine bean supplementation on the gut microbiota in mice. (A) Fecal TC. (B-C) Alpha diversity for the gut microbial community. (D) The heat map depicts the bacterial species and relative abundance of the top 20 species level in each sample. (E) The heat map depicts PICRUSt predicted metabolic pathways (n=3). \*p <0.05 and \*\* p<0.01 versus control, # p <0.05 and ## p<0.01 versus CON.
