# Supplementary material for: Perillartine protects against metabolic associated fatty liver in high-fat diet-induced obese mice
Source: Royal Society of Chemistry journal article supplement (doi:10.1039/d2fo02227c), 2022-12-21
Supplement: d2fo02227c3.pdf [file d2fo02227c3.pdf]

CON

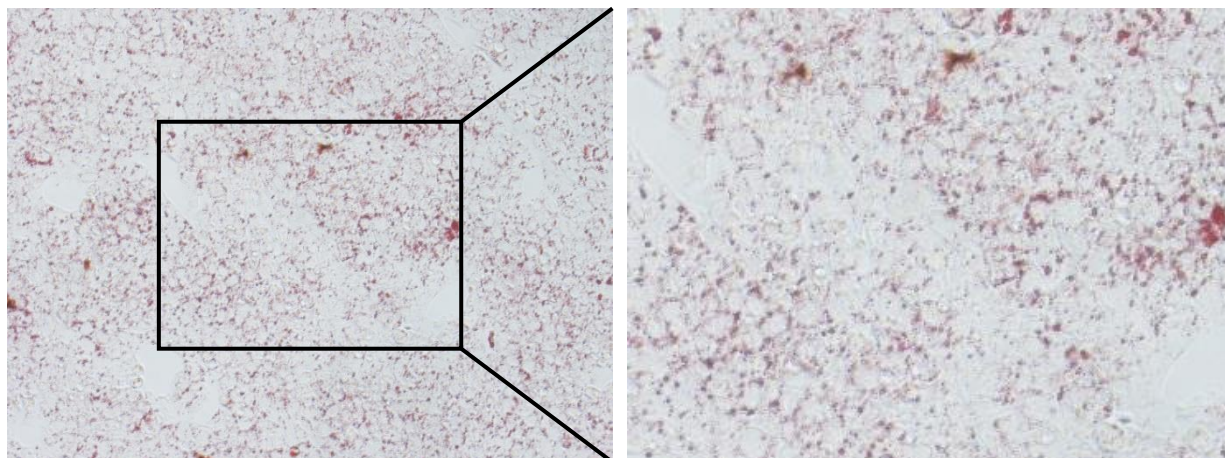

OA/PA

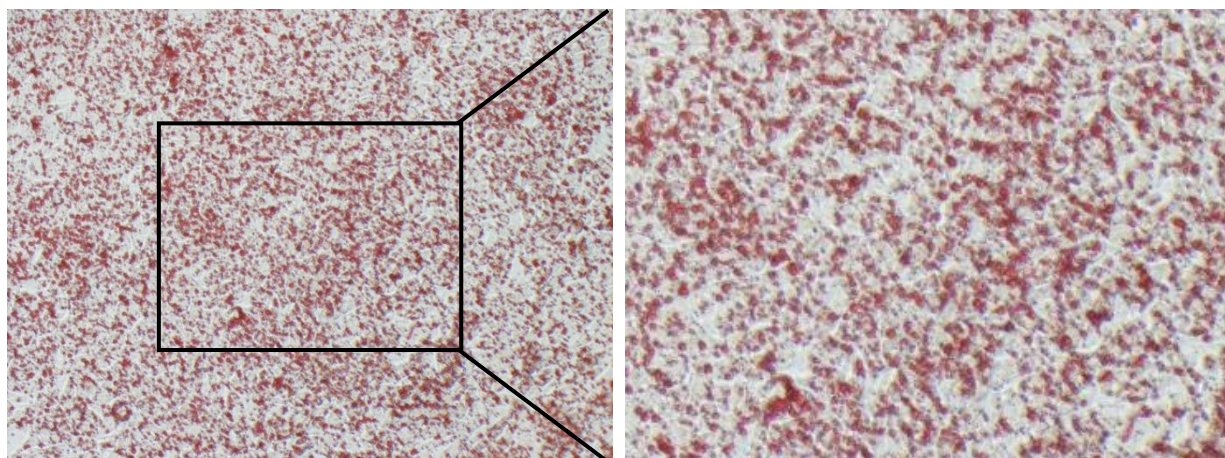

OA/PA+Perillartine

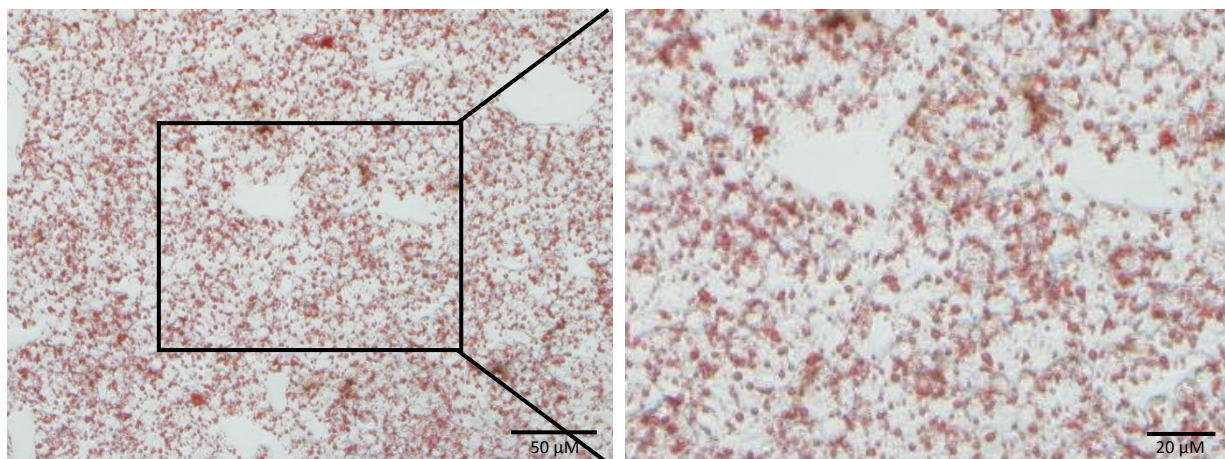

Supplemental figure 2. Oil red O staining of HepG2 cells



**CON**

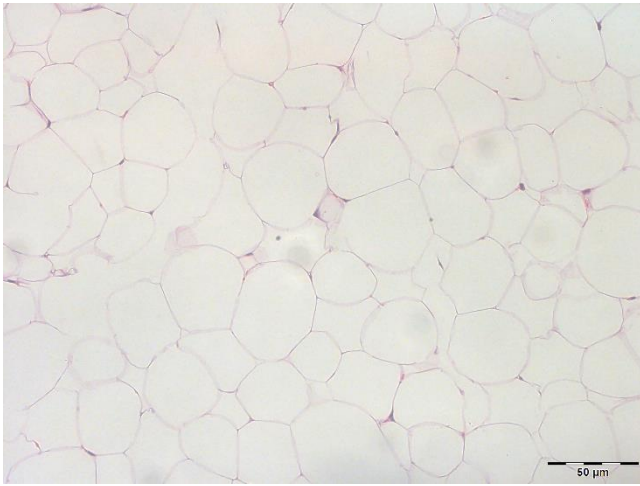

**HFD**

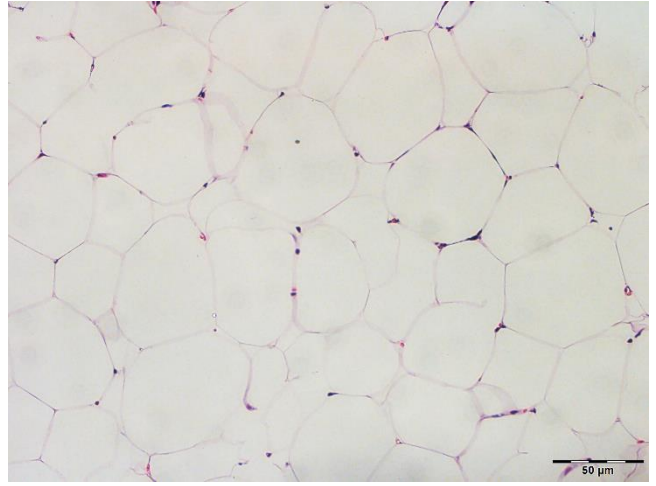

**CON+0.8**

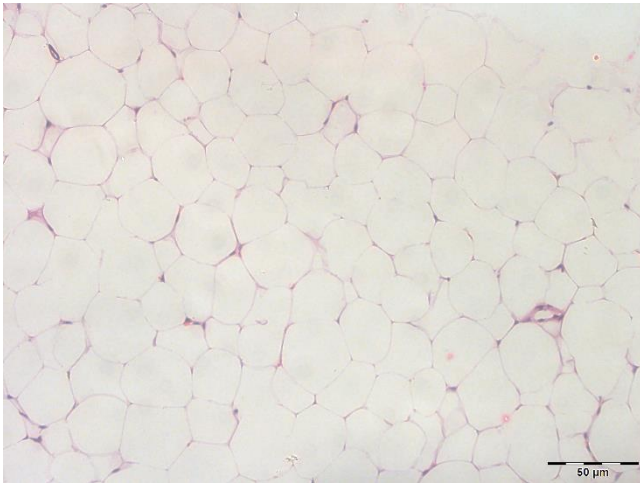

**HFD+0.8**

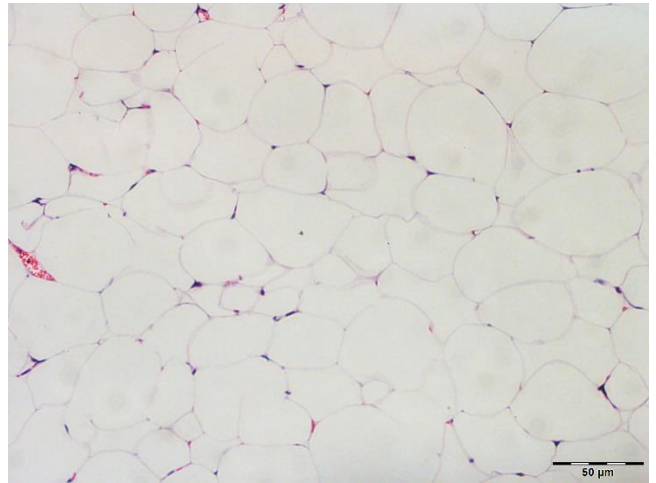

**CON+1.6**

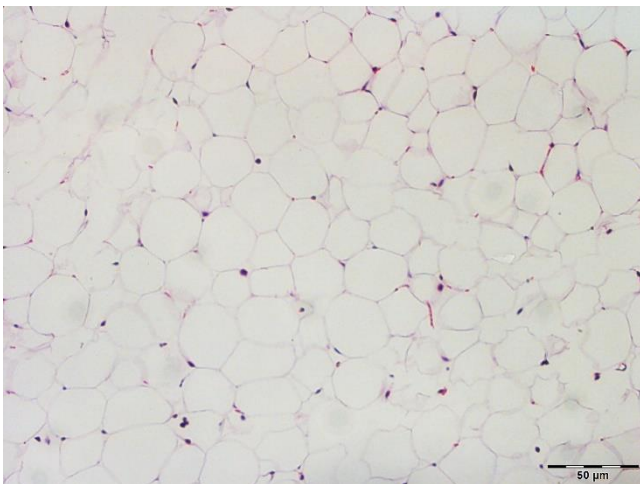

**HFD+1.6**

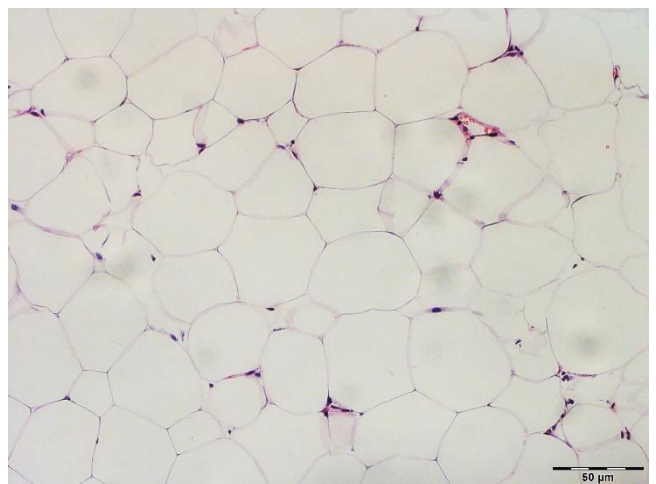

Supplemental figure 3. H&E staining of epididymal fat sections



CON

CON+0.8

CON+1.6

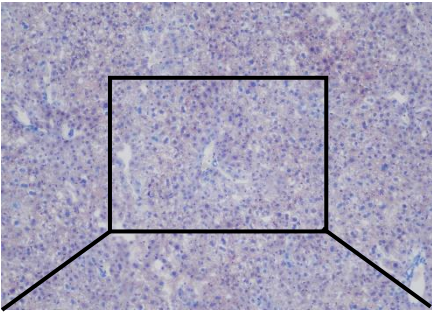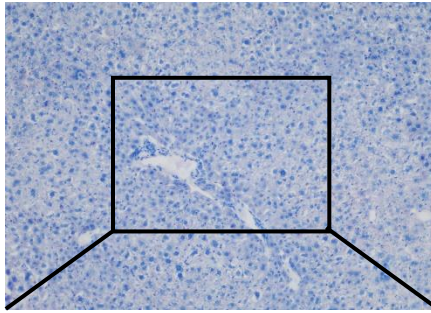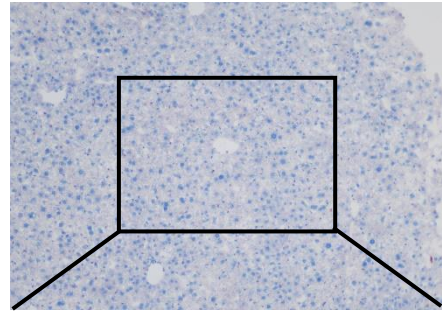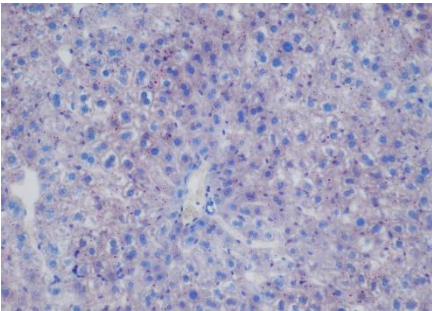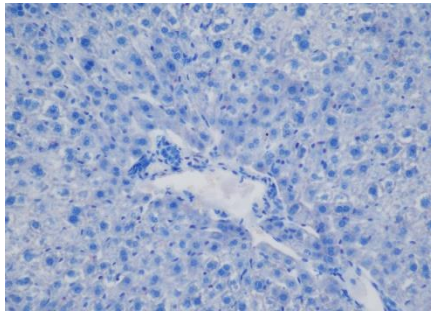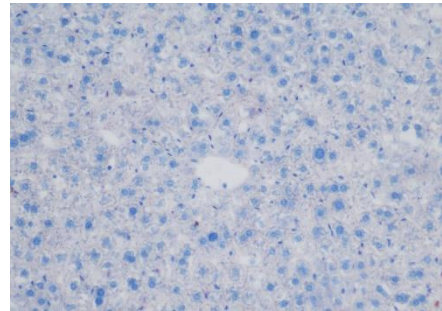

HFD

HFD+0.8

HFD+1.6

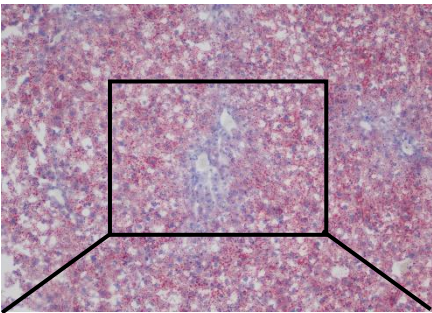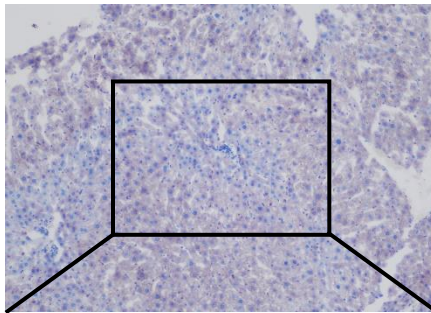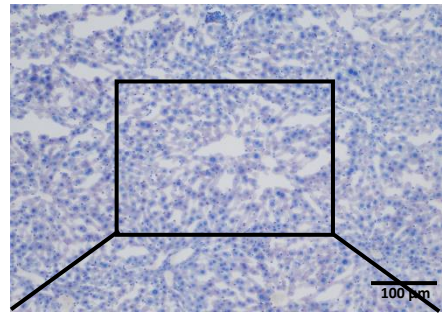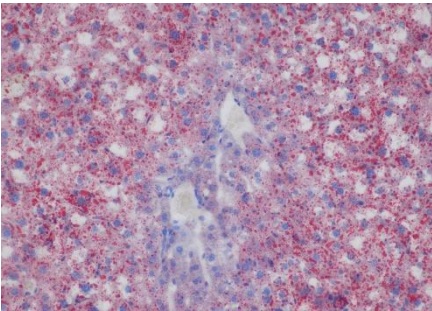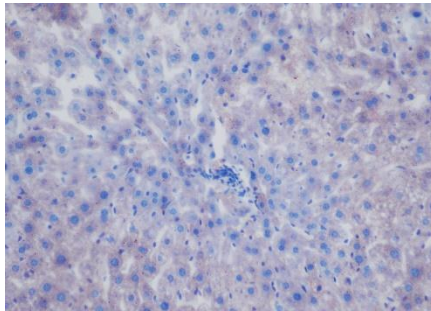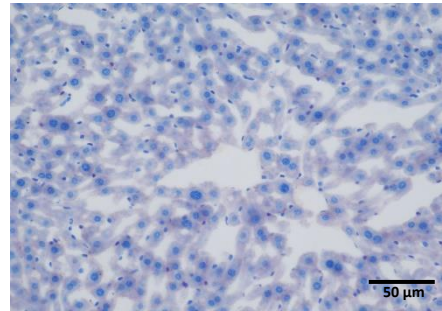

Supplemental figure 4. Oil red O staining of epididymal fat sections



CON

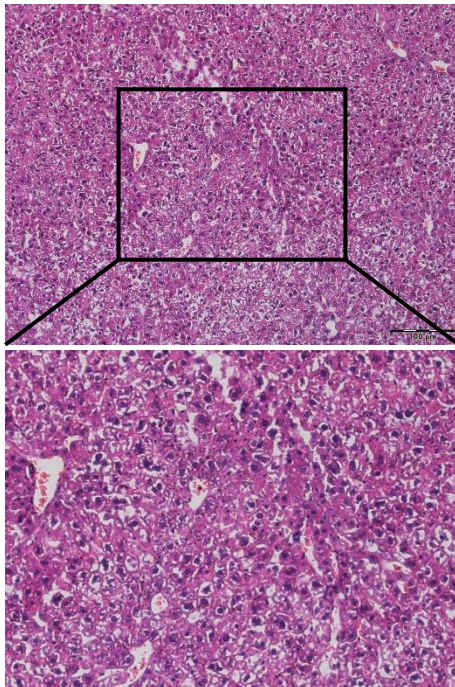

CON+0.8

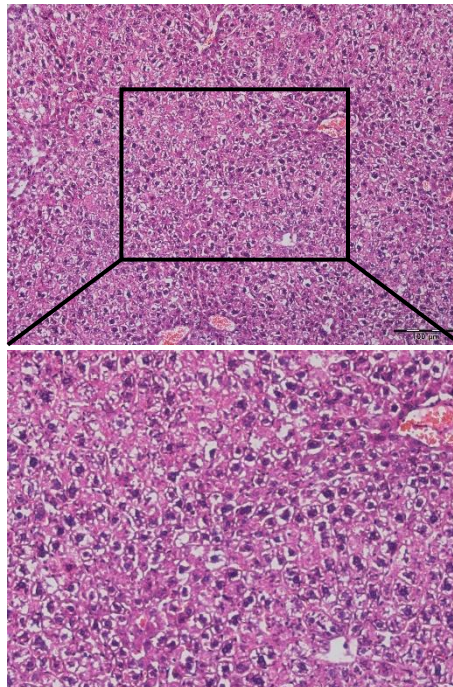

CON+1.6

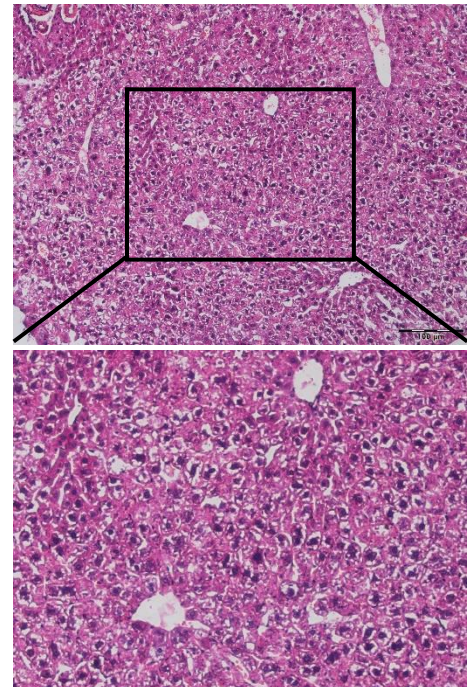

HFD

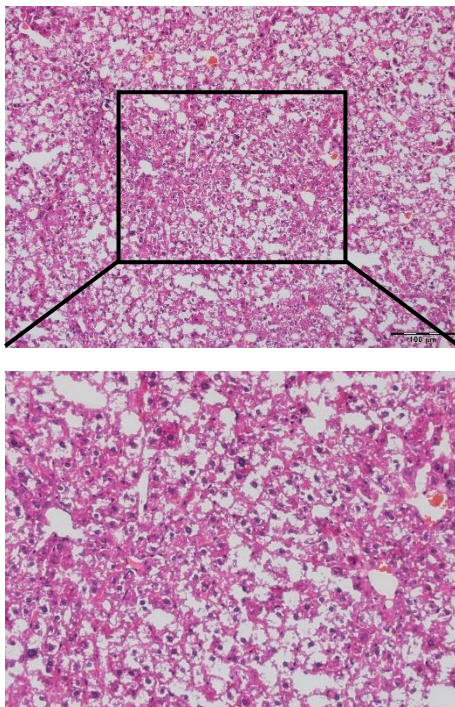

HFD+0.8

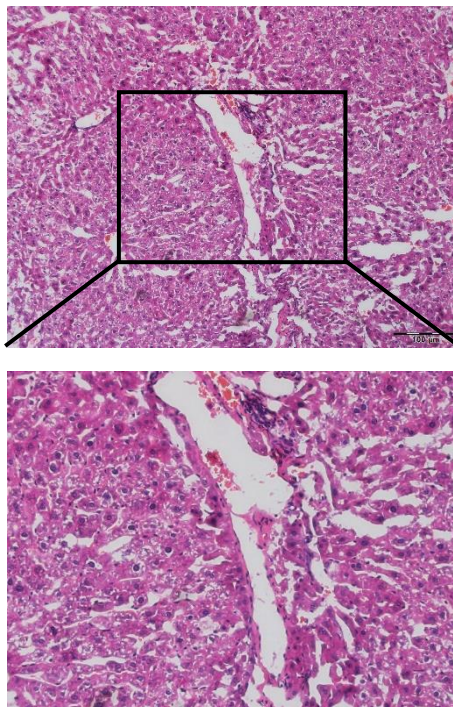

HFD+1.6

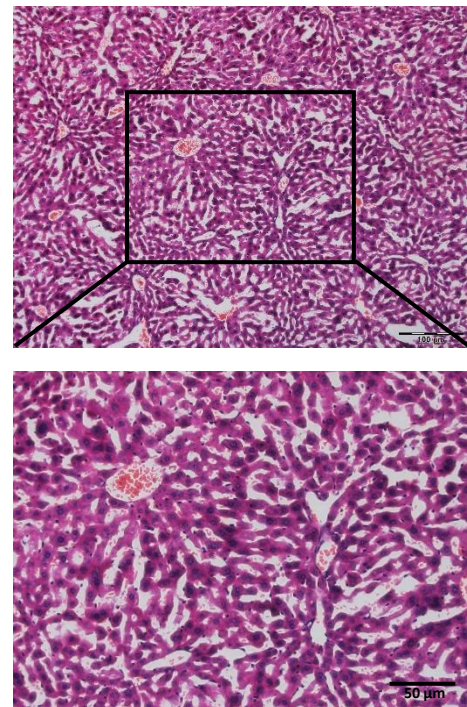

Supplemental figure 5. H&E staining of epididymal fat sections



A

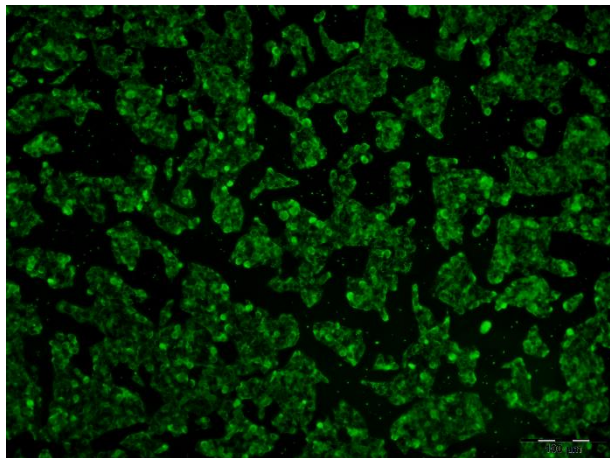

0  $\mu$ M

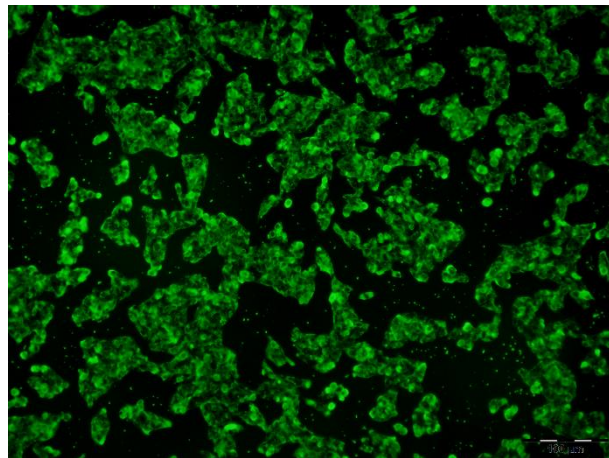

75  $\mu$ M

B

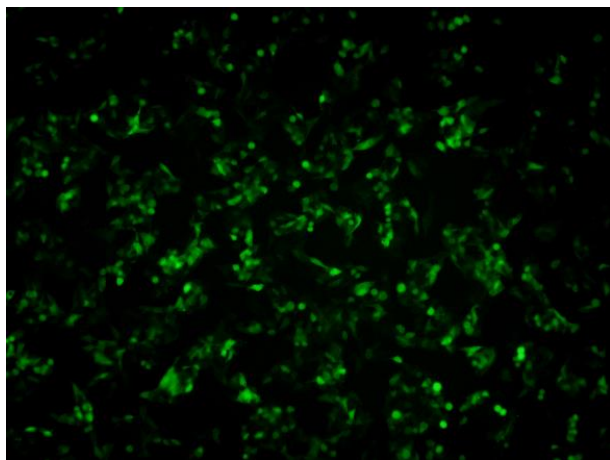

0  $\mu$ M

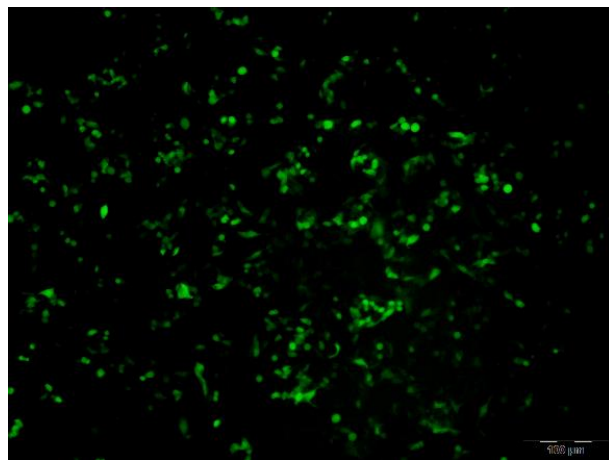

75  $\mu$ M

Supplemental figure 6. Mitochondrial fluorescent image of HepG2 cells; ROS fluorescent image of HepG2 cells.
