# Supplementary material for: Perillartine protects against metabolic associated fatty liver in high-fat diet-induced obese mice
Source: Royal Society of Chemistry journal article supplement (doi:10.1039/d2fo02227c), 2022-12-21
Supplement: d2fo02227c4.pdf [file d2fo02227c4.pdf]

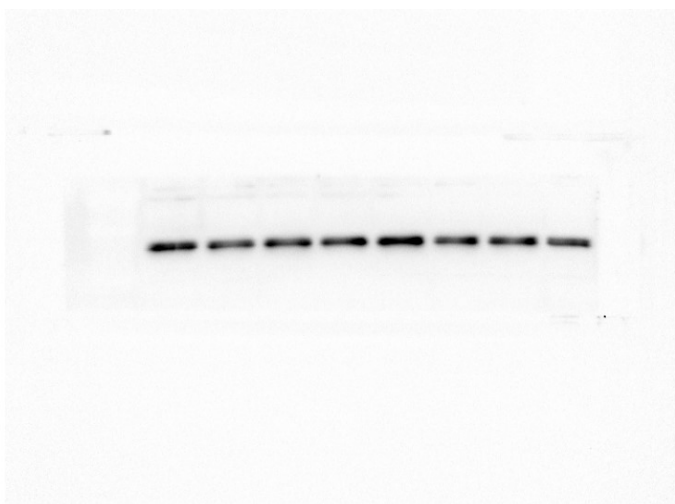

Figure1. Original picture of the Akt western blot (the first four wells were spiked with no perillartine, and the last four wells were spiked with 75  $\mu$ M perillartine)

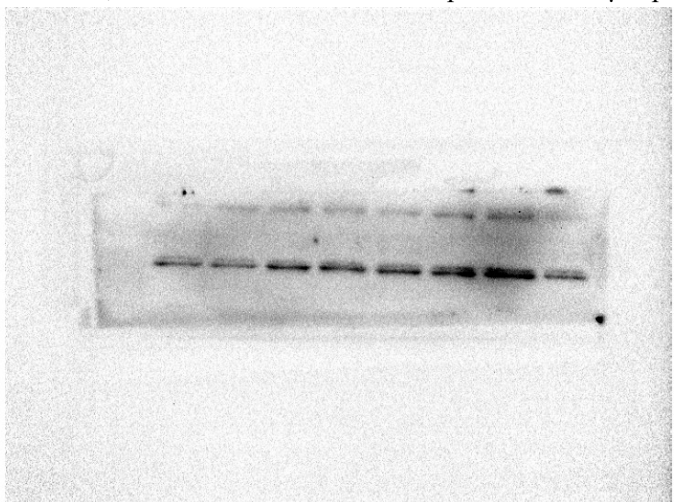

Figure2. Original picture of the phospho-Akt (Ser473) western blot (the first four wells were spiked with no perillartine, and the last four wells were spiked with 75  $\mu$ M perillartine)

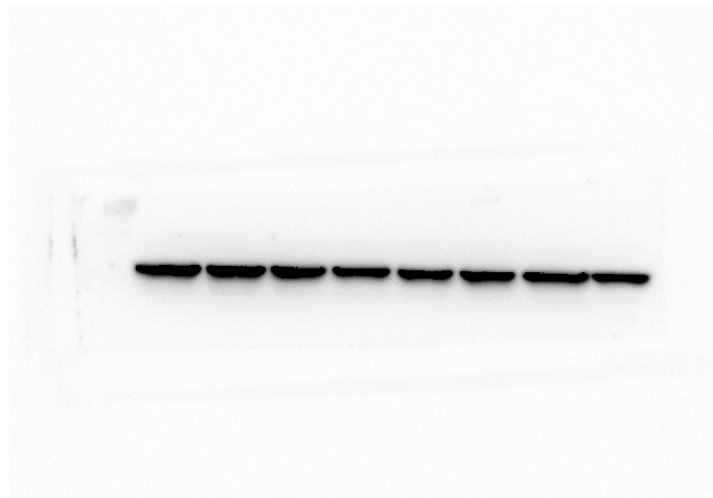

Figure3. Original picture of the  $\alpha$ -tubulin western blot (the first four wells were spiked with no perillartine, and the last four wells were spiked with 75  $\mu$ M perillartine)
